# Supplementary material for: First Report of the Colistin Resistance Gene mcr-10.1 Carried by IncpA1763-KPC Plasmid pSL12517-mcr10.1 in Enterobacter cloacae in Sierra Leone
Source: PubMed Central journal article supplement (PMC9431528; doi:10.1128/spectrum.01127-22), 2022-06-13
Supplement: spectrum.01127-22-s0001.pdf [file spectrum.01127-22-s0001.pdf]

**TABLE S1. Background information of the 19 bacterial isolates analyzed in this study**

| <b>Bacterium</b>                  | <b>Isolate</b> | <b>Country</b> | <b>Hospital/farm</b> | <b>Year</b> | <b>Host</b>            | <b>Specimen</b>         | <b>Source</b> |
|-----------------------------------|----------------|----------------|----------------------|-------------|------------------------|-------------------------|---------------|
| <i>Enterobacter cloacae</i>       | SL12517        | Sierra Leone   | Hospital A           | 2018        | Homo sapiens           | Urine                   | This study    |
| <i>Enterobacter cloacae</i>       | PIMB10EC27     | Vietnam        | Hospital B           | 2010        | Homo sapiens           | Urine                   | GenBank       |
| <i>Enterobacter cloacae</i>       | RHBSTW-00399   | UK             | Not applicable       | 2017        | Environment            | Wastewater              | GenBank       |
| <i>Enterobacter cloacae</i>       | En37           | Japan          | Not applicable       | 2015        | Canis lupus familiaris | Pus                     | GenBank       |
| <i>Enterobacter roggenskampii</i> | Ecl_20_981     | China          | Not applicable       | 2019        | Environment            | Wastewater              | GenBank       |
| <i>Enterobacter roggenskampii</i> | Ecl-983        | China          | Hospital D           | 2019        | Environment            | Wastewater              | GenBank       |
| <i>Enterobacter roggenskampii</i> | OIPH-N260      | Japan          | Not applicable       | 2019        | Homo sapiens           | Not applicable          | GenBank       |
| <i>Enterobacter roggenskampii</i> | YK16           | China          | Farm A               | 2019        | Chicken                | Anal swab               | GenBank       |
| <i>Enterobacter roggenskampii</i> | WCHER090065    | China          | Hospital F           | 2016        | Homo sapiens           | Not applicable          | GenBank       |
| <i>Enterobacter roggenskampii</i> | STW0522-66     | Japan          | Not applicable       | 2018        | Environment            | Wastewater              | GenBank       |
| <i>Raoultella ornithinolytica</i> | FDAARGOS_431   | Canada         | Hospital E           | 2015        | Homo sapiens           | Rectal                  | GenBank       |
| <i>Raoultella ornithinolytica</i> | NUITM-VR1      | Vietnam        | Not applicable       | 2021        | Not applicable         | Not applicable          | GenBank       |
| <i>Enterobacter hormaechei</i>    | ECC59          | China          | Hospital C           | 2017        | Homo sapiens           | Broncho-alveolar lavage | GenBank       |
| <i>Enterobacter asburiae</i>      | RHBSTW-01009   | UK             | Not applicable       | 2017        | Environment            | Wastewater              | GenBank       |

|                              |                   |             |                |      |                |                |         |
|------------------------------|-------------------|-------------|----------------|------|----------------|----------------|---------|
| <i>Enterobacter kobei</i>    | STW0522-51        | Japan       | Not applicable | 2018 | Environment    | Wastewater     | GenBank |
| <i>Enterobacter</i>          | RHBSTW-00175      | UK          | Not applicable | 2017 | Environment    | Freshwater     | GenBank |
| <i>Klebsiella pneumoniae</i> | INF133-sc-2279960 | Australia   | Not applicable | 2015 | Not applicable | Not applicable | GenBank |
| <i>K. quasipneumoniae</i>    | SB610             | Netherlands | Not applicable | 2000 | Environment    | Water          | GenBank |
| <i>Citrobacter freundii</i>  | B38               | China       | Hospital G     | 1998 | Homo sapiens   | Not applicable | GenBank |
